# Supplementary material for: Multifunctional triple-porous Fe3O4@SiO2 superparamagnetic microspheres for potential hyperthermia and controlled drug release
Source: Royal Society of Chemistry journal article supplement (doi:10.1039/c7ra00899f), 2017-01-01
Supplement: c7ra00899f1.pdf [file c7ra00899f1.pdf]

## Electronic Supplementary Information (ESI)

### Multifunctional triple-porous $\text{Fe}_3\text{O}_4@\text{SiO}_2$ superparamagnetic microspheres for potential hyperthermia and controlled drug release

Xuegang Lu\*, Qianru Liu, Liqun Wang, Wenyang Zhang, Wenfeng Jiang, Xiaoping Song

MOE Key Laboratory for Non-equilibrium Synthesis and Modulation of Condensed Matter.

School of Science, Xi'an Jiaotong University, Xi'an 710049, China.

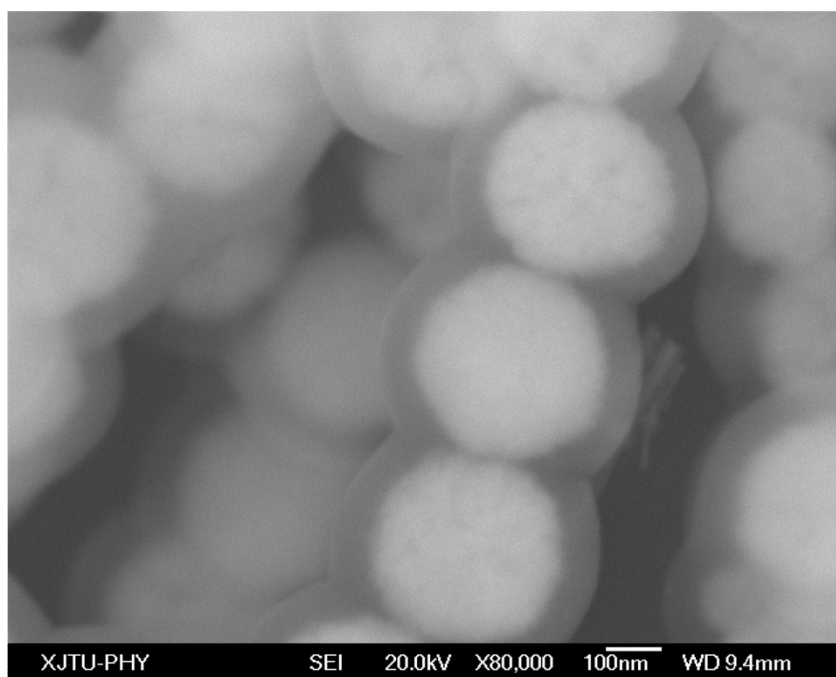

Fig. S1 SEM image for  $m\text{-Fe}_3\text{O}_4@\text{CTAB}/\text{SiO}_2$  microspheres.

---

\*Corresponding author.: Xuegang Lu, Tel.: +86 29 82663034; fax: +86 29 83237910. E-mail address: xglu@mail.xjtu.edu.cn

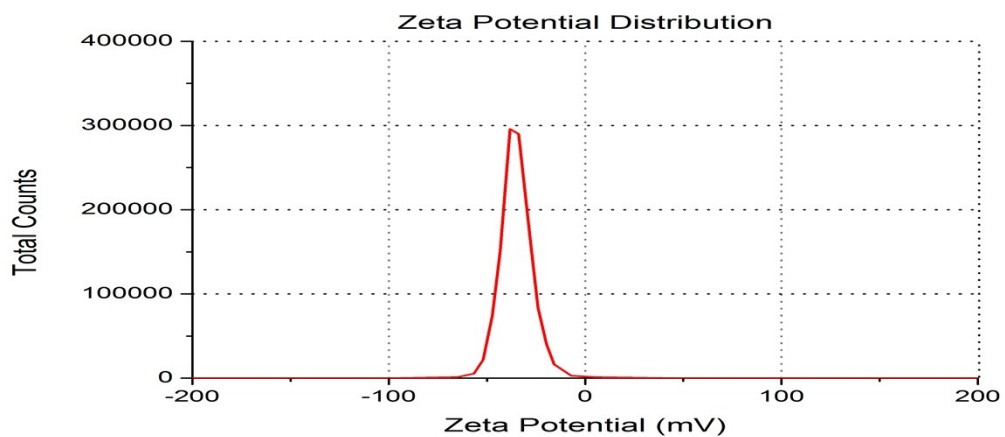

Fig. S2 Zeta potential distribution of the initial prepared  $m\text{-Fe}_3\text{O}_4@dm\text{-SiO}_2$  microspheres in aqueous solution.

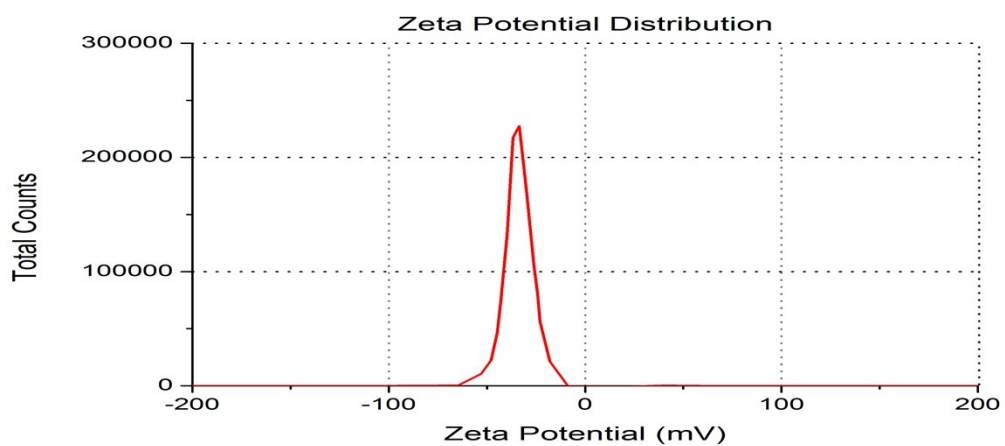

Fig. S3 Zeta potential distribution of the  $m\text{-Fe}_3\text{O}_4@dm\text{-SiO}_2$  microspheres in aqueous solution after being stored for 30 days.

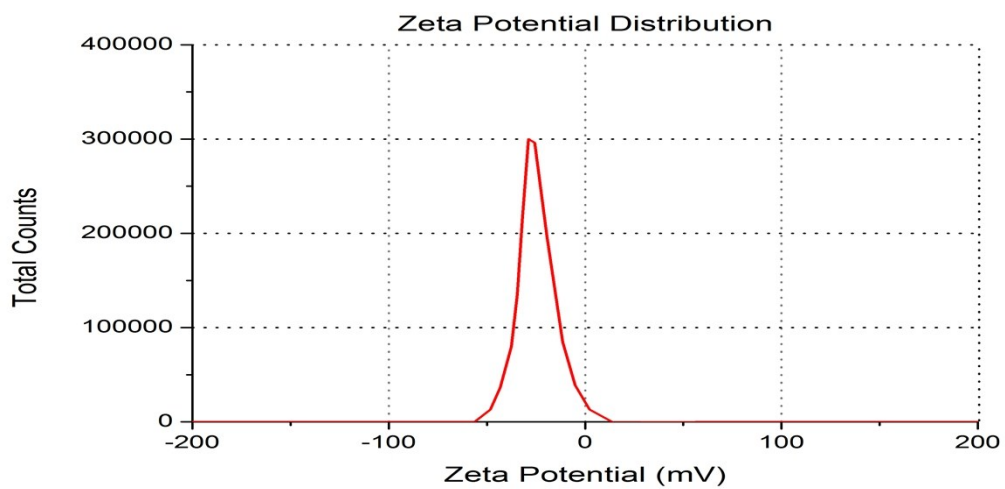

Fig. S4 Zeta potential distribution of the  $m\text{-Fe}_3\text{O}_4@dm\text{-SiO}_2$  microspheres in PBS buffer solution at pH 7.4.

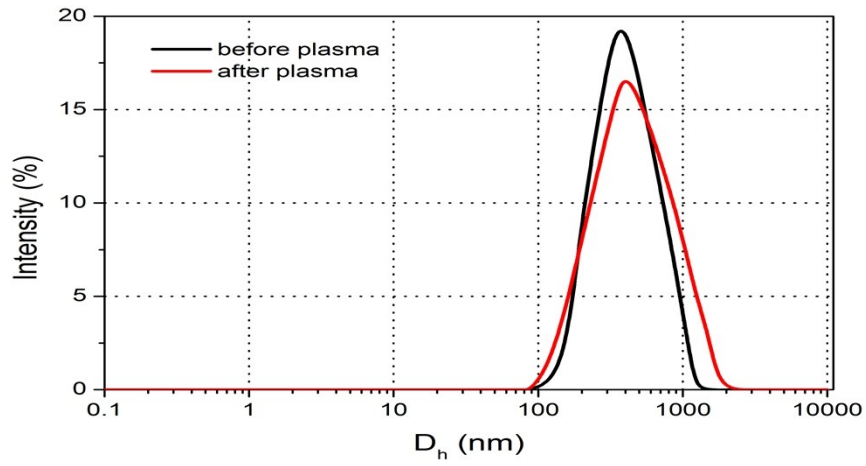

Fig. S5 Mean hydrodynamic diameter ( $D_h$ ) changes of  $m\text{-Fe}_3\text{O}_4@dm\text{-SiO}_2$  microspheres before and after incubation with human blood plasma

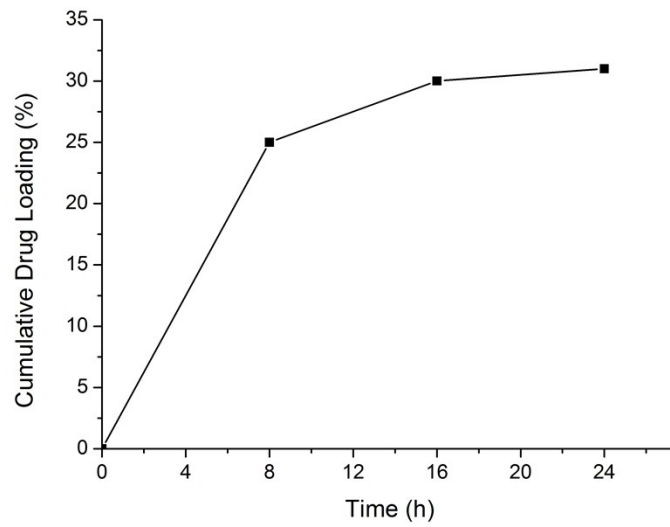

Fig. S6 Drug loading profile in mesoporous  $m\text{-Fe}_3\text{O}_4@dm\text{-SiO}_2$  microspheres

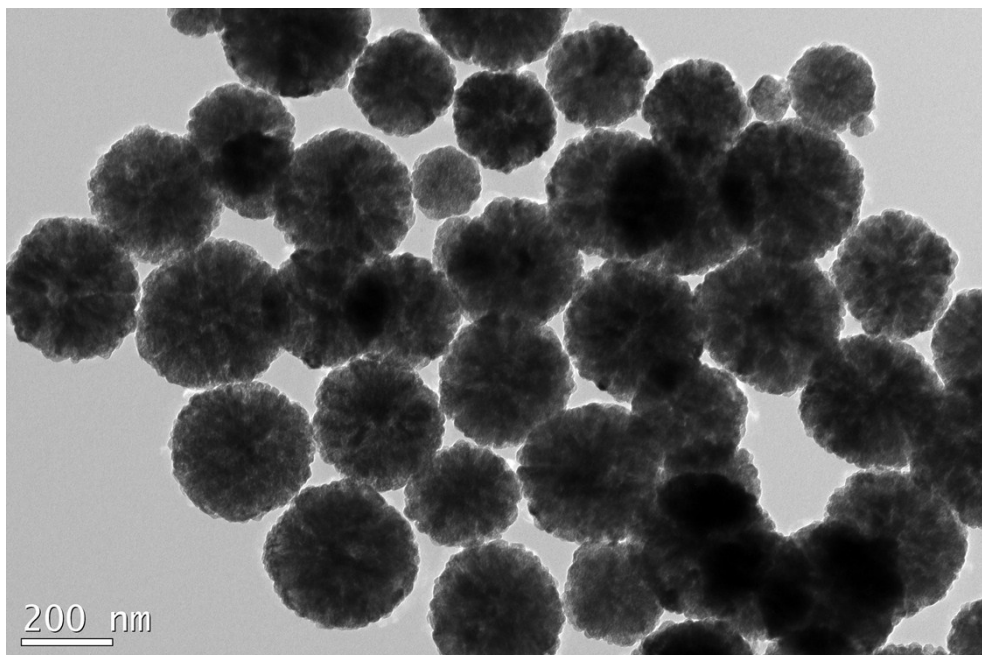

Fig. S7 TEM image of porous Fe<sub>3</sub>O<sub>4</sub> microspheres

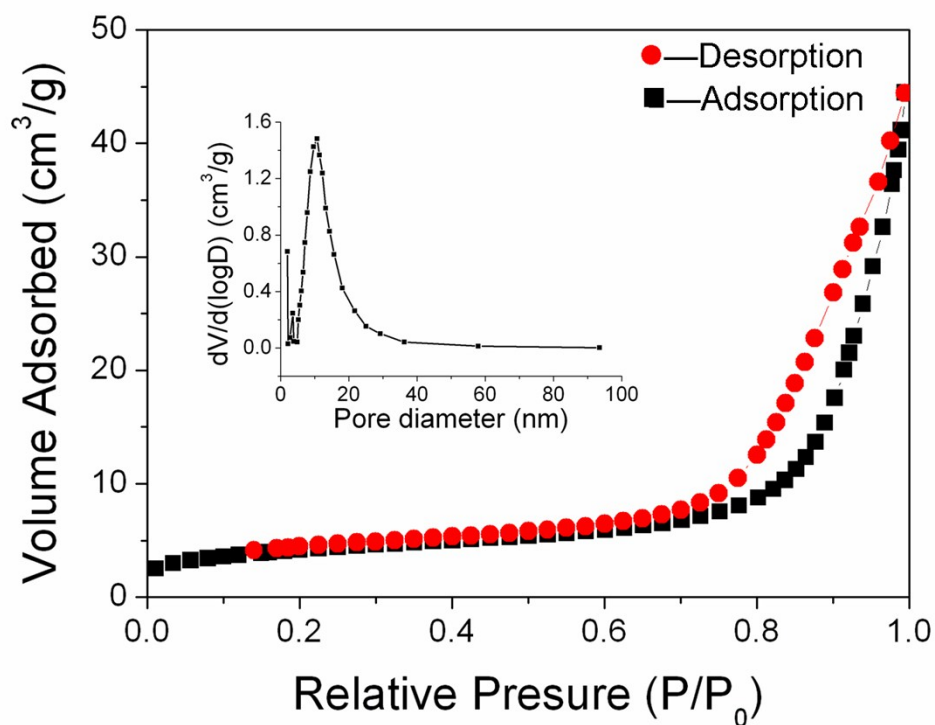

Fig. S8 N<sub>2</sub> adsorption-desorption isotherms and pore size distribution (the inset) of the synthesized porous

$\text{Fe}_3\text{O}_4$  microspheres. The BET surface area is  $26.5 \text{ m}^2/\text{g}$ .

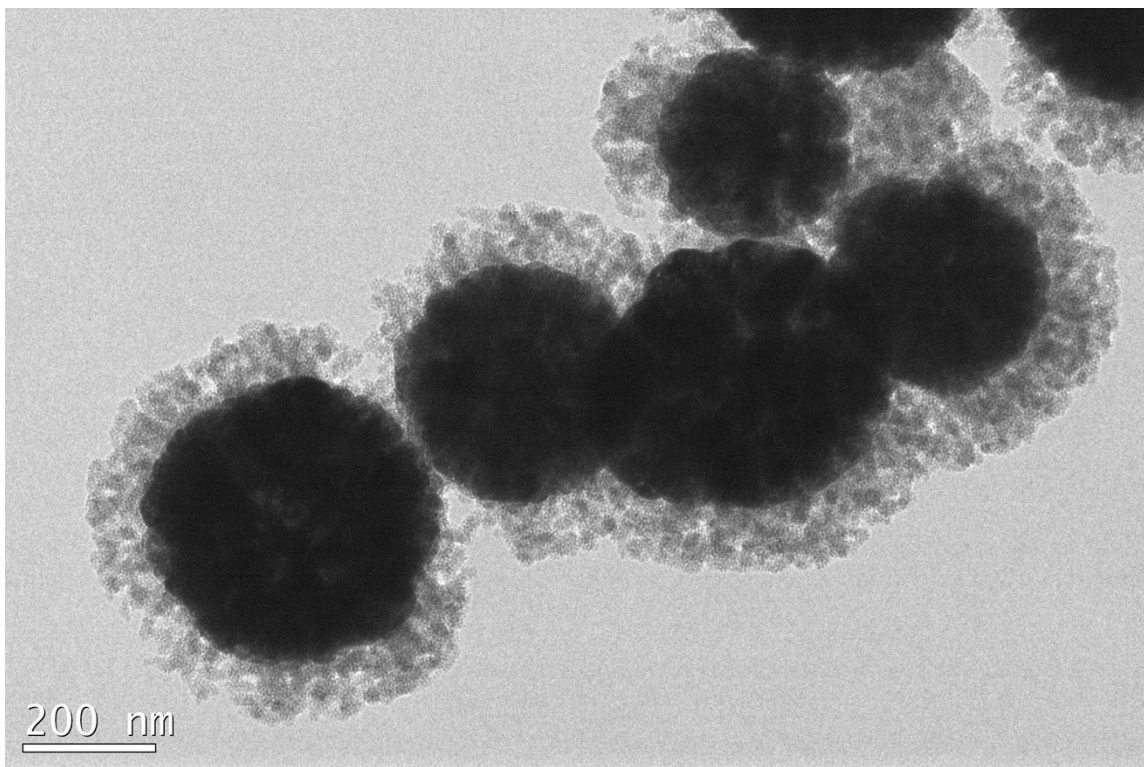

Fig. S9 TEM image of  $m\text{-Fe}_3\text{O}_4@dm\text{-SiO}_2$  microspheres after 3 h of hot water etching

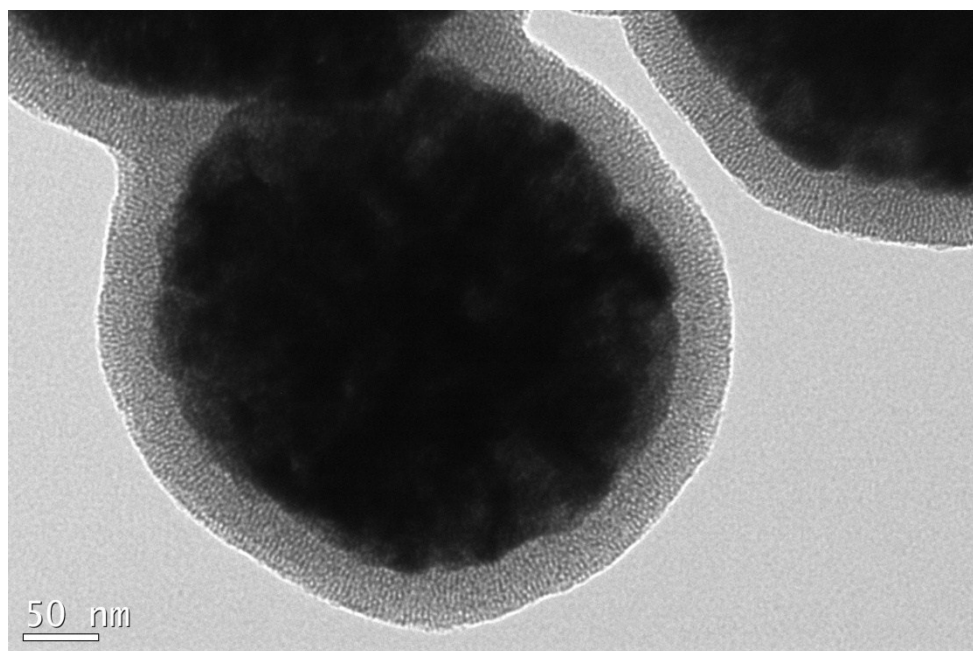

Fig. S10 TEM image of  $m\text{-Fe}_3\text{O}_4@m\text{-SiO}_2$  microspheres prepared with CTAB templating and without PVP protecting. Only perpendicular aligned mesochannels can be observed in  $\text{SiO}_2$  shells.

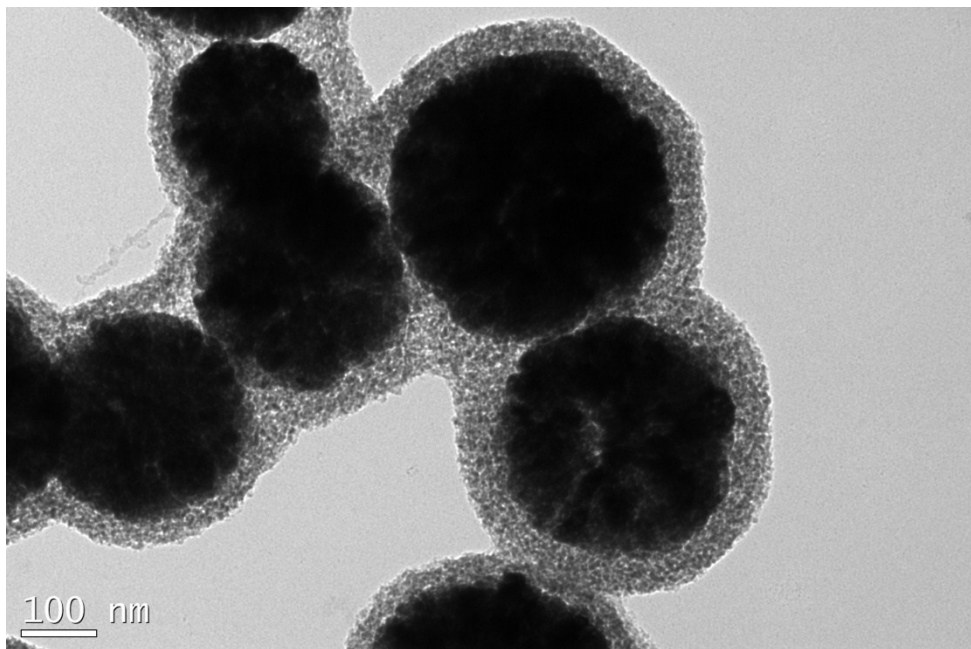

Fig. S11 TEM image of  $m\text{-Fe}_3\text{O}_4@m\text{-SiO}_2$  microspheres prepared with PVP protecting and without CTAB templating. Only randomly distributed pores can be observed in  $\text{SiO}_2$  shells.

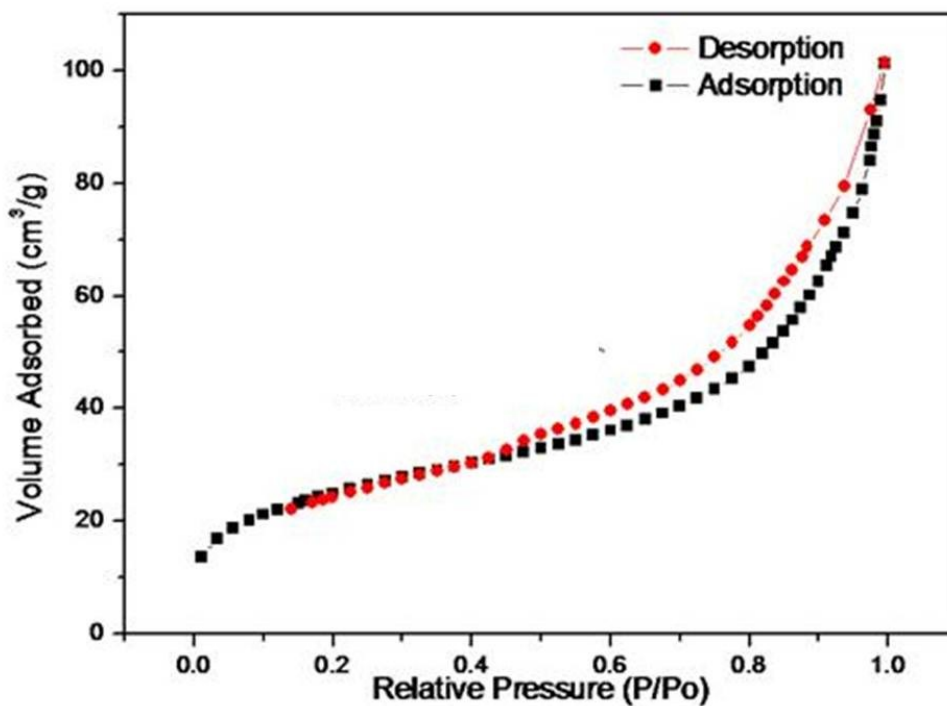

Fig. S12  $\text{N}_2$  adsorption-desorption isotherms of the  $m\text{-Fe}_3\text{O}_4@m\text{-SiO}_2$  microspheres prepared with CTAB templating and without PVP protecting. The BET surface area is  $304.5 \text{ m}^2/\text{g}$



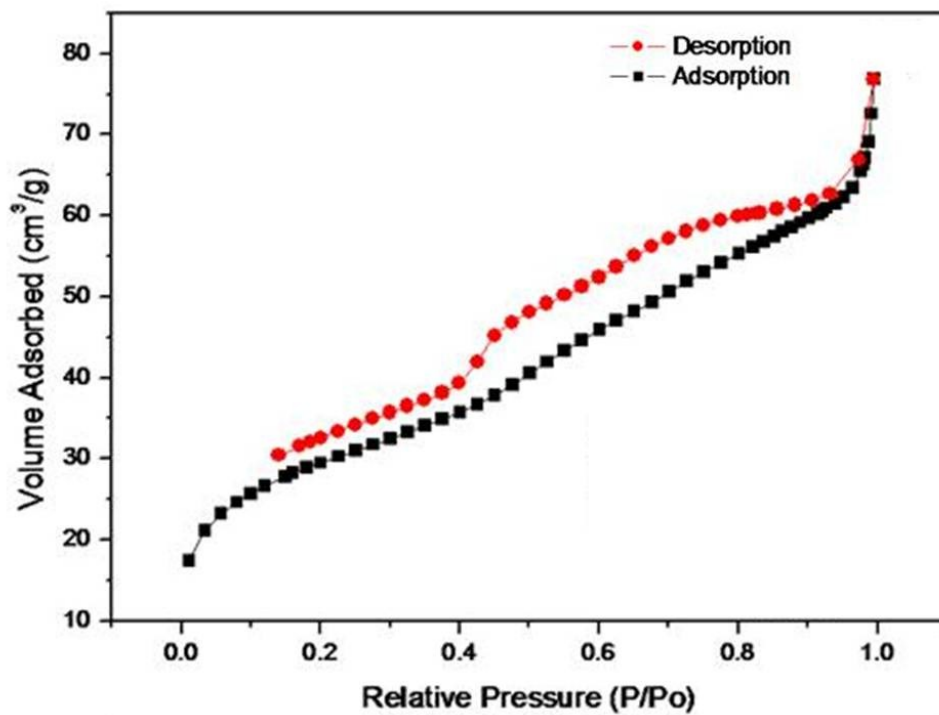

Fig. S13  $N_2$  adsorption-desorption isotherms of the  $m\text{-Fe}_3\text{O}_4@m\text{-SiO}_2$  microspheres prepared with PVP protecting and without CTAB templating. The BET surface area is  $86.9\text{ m}^2/\text{g}$ .

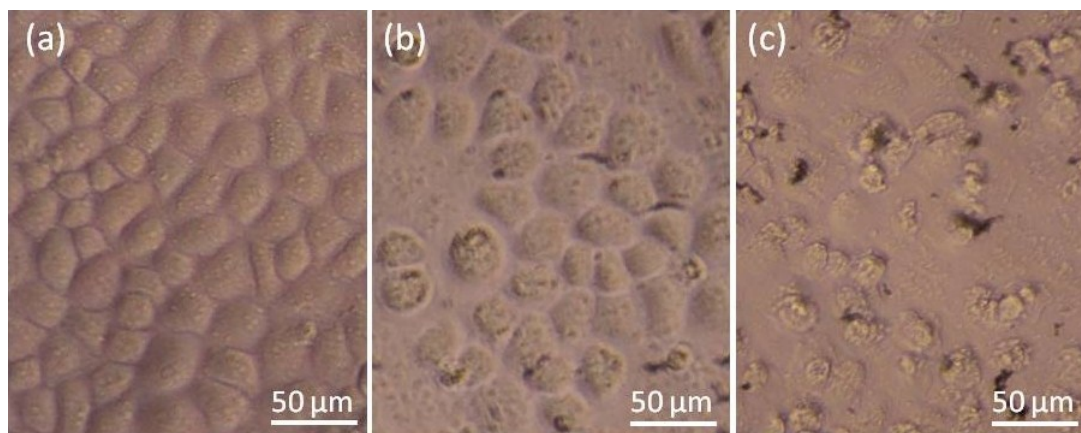

Fig. S14 Images of SGC-7901 cells after being cultured at different concentrations of  $m\text{-Fe}_3\text{O}_4@dm\text{-SiO}_2/5\text{-FU}$  for 24 h: (a)  $0\text{ }\mu\text{g/mL}$ , (b)  $32\text{ }\mu\text{g/mL}$ , (c)  $200\text{ }\mu\text{g/mL}$
